# Supplementary material for: Immobilized fibrinogen activates human platelets through glycoprotein VI
Source: PubMed Central journal article supplement — Haematologica. 2018 Feb 22;103(5):898–907. doi: 10.3324/haematol.2017.182972 (PMC5927996; doi:10.3324/haematol.2017.182972), 2018-05
Supplement: 2017_182972-Disclosures_and_Contributions.pdf [file 2017_182972-Disclosures_and_Contributions.pdf]

Haematologica  
HAEMATOL/2017/182972  
Version 4

Immobilized fibrinogen activates human platelets through GPVI

Pierre H Mangin, Marie-Blanche Onselaer, Nicolas Receveur, Nicolas Le Lay, Alexander T Hardy, Clare Wilson, Ximena Sanchez, Stephane Loyau, Arnaud Dupuis, Amir K Babar, Jeanette LC Miller, Helen Philippou, Craig E Hughes, Andrew B Herr, Robert AS Ariëns, Diego Mezzano, Martine Jandrot-Perrus, Christian Gachet, and Steve P Watson

Disclosures: Martine Jandrot: founder of Acticor Biotech. Christian Gachet: cofounder of Acticor Biotech. All other authors have declared that no conflict of interest exists.

Contributions: ABH, MBO, CEH, CW, NR, SL, NLL and XS performed key experiments. DM, HP, RA and AH designed key experiments and provided key reagents. AD, AKB and JM provided key reagents. PHM, MJP, CG and SPW planned and designed the study, and wrote the paper. All authors critiqued and approved the final version of the paper.
